# Supplementary material
Source: Springer Nature journal article supplement (https://www.springermedizin.de/resource/supplementary/12955_2014_1325_MOESM2_ESM.pdf/9559552)

percentage(%)

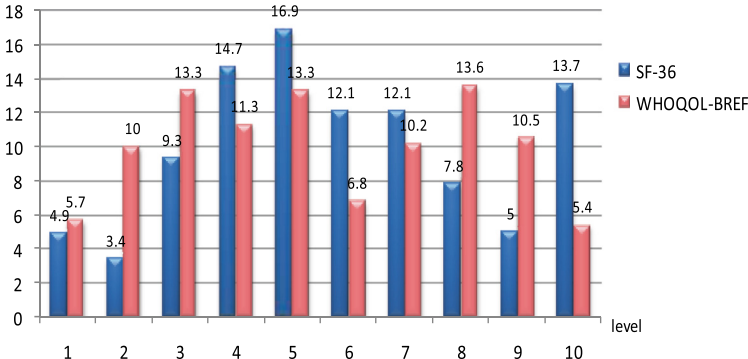

Supplement: MOESM2 [file 9559552]
